# Supplementary material
Source: PubMed Central journal article supplement (PMC10811744)
Supplement: NIHMS1922024-supplement-2.pdf [file NIHMS1922024-supplement-2.pdf]

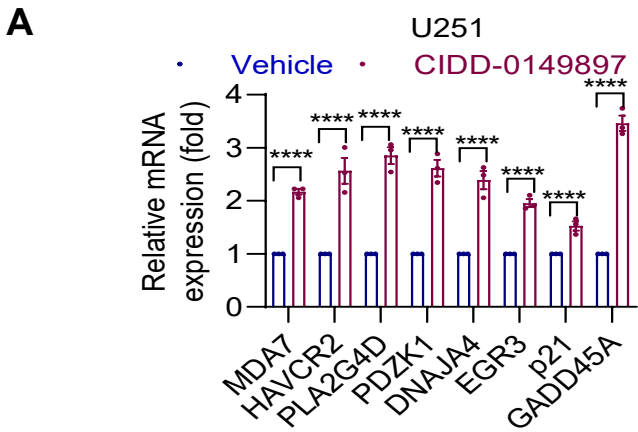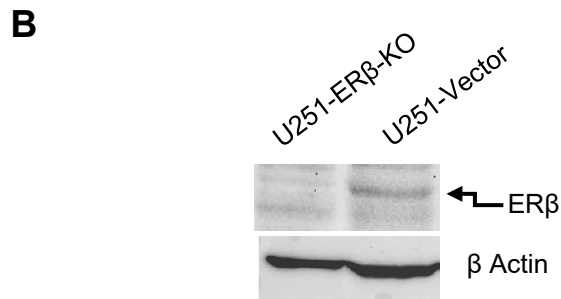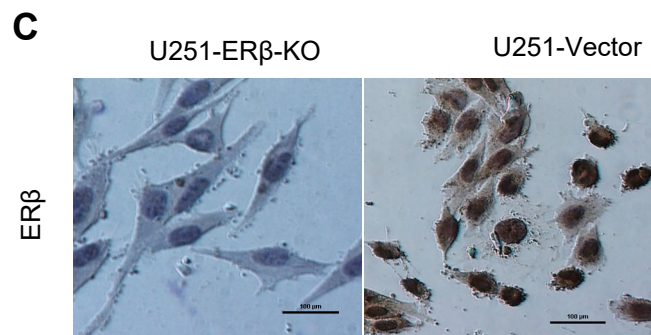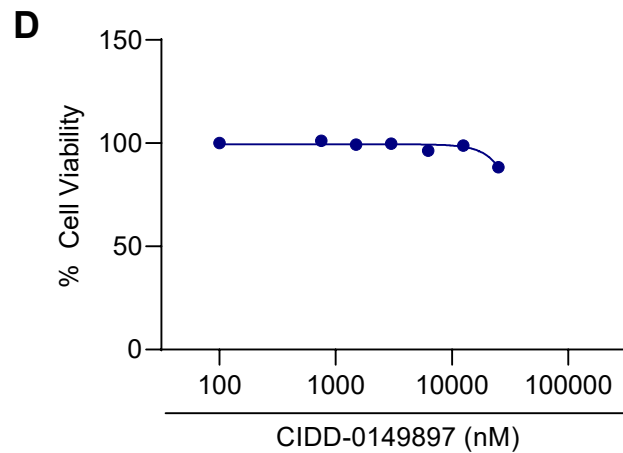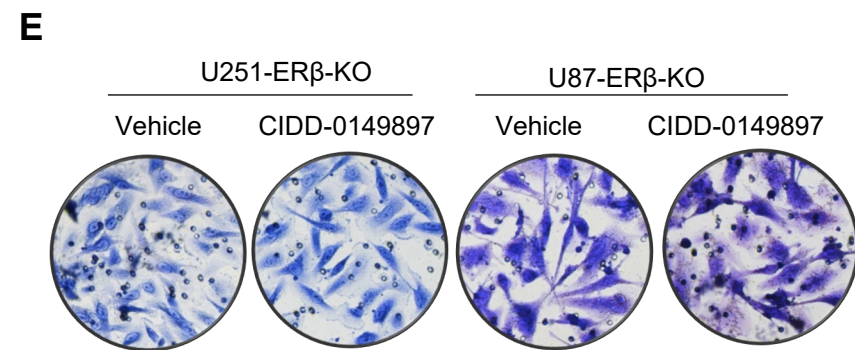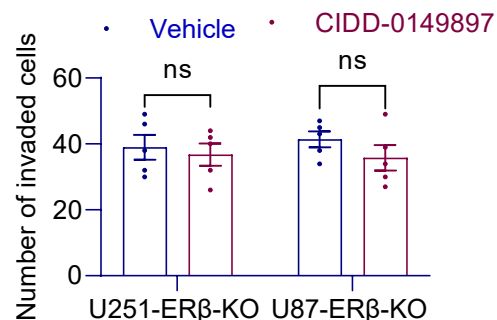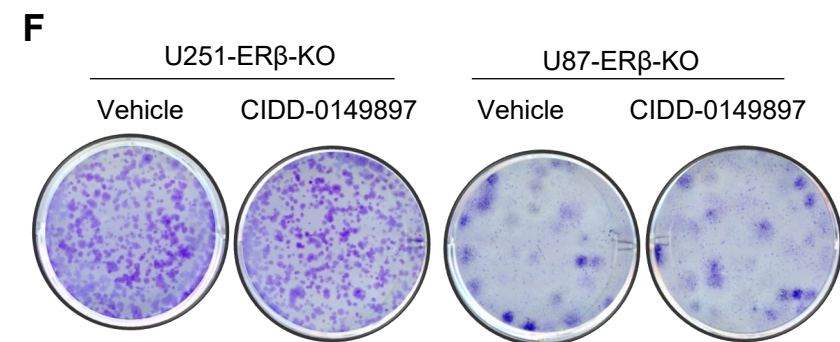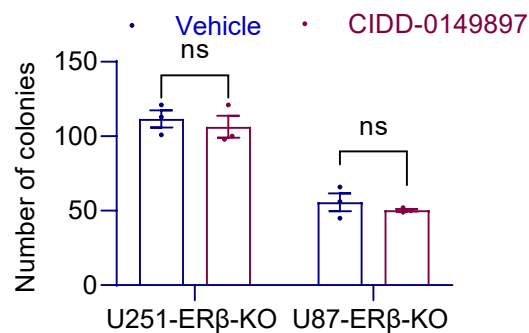

**Supplementary Fig. S2.** A, Effect of CIDD-0149897 treatment (10 μM, 72h) on ERβ targeted genes was measured using RT-qPCR analysis in U251 cell line (n=3). B, Western blot analysis of total lysates from U251-vector and U251-ERβ-KO cells. C, On fibronectin-coated plates, U251-vector and U251-ERβ-KO cells were plated and after 24 hours, the cells were fixed in 4% paraformaldehyde and stained with an ER antibody using ICC. D, Effect of increasing doses of CIDD-0149897 treatment (24h) on the cell viability of U251 GBM model cells expressing ERβ was measured using the MTT cell viability assay. E, Effect of CIDD-0149897 (10 μM, 22h) on cell invasion of U251-vector and U251-ERβ-KO model cells was determined using Matrigel invasion chamber assays (n=3). F, Effect of CIDD-0149897 (10 μM) on cell survival of U251-vector and U251-ERβ-KO cells was measured using colony formation assays. (n=3).
