# Supplementary material
Source: PubMed Central journal article supplement (PMC10811744)
Supplement: NIHMS1922024-supplement-3.pdf [file NIHMS1922024-supplement-3.pdf]

**A**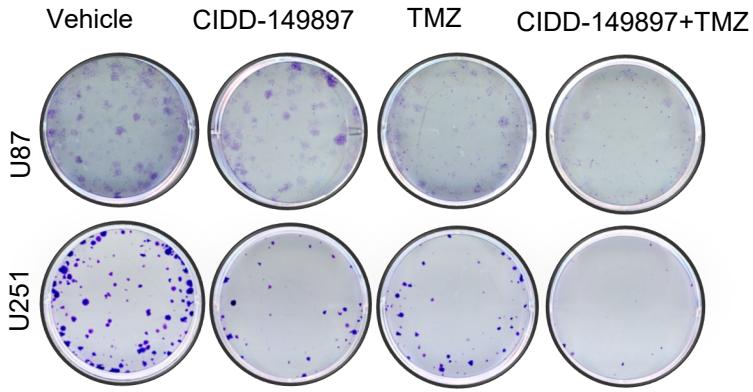**B**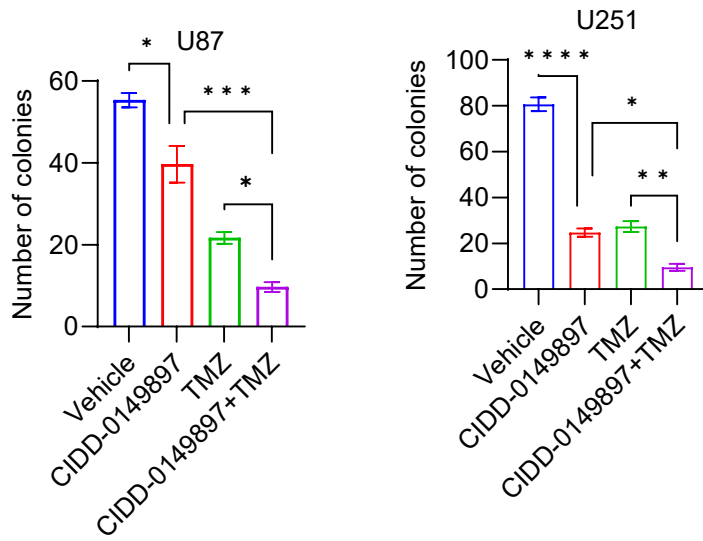

**Supplementary Fig. S3.** A, Effect of CIDD-0149897 (10  $\mu$ M), Temozolomide (TMZ, 10  $\mu$ M) alone or in combination on cell survival of U87, U251 cells was measured using colony formation assays. B, quantification of colony formation is shown.
