# Supplementary material
Source: PubMed Central journal article supplement (PMC10811744)

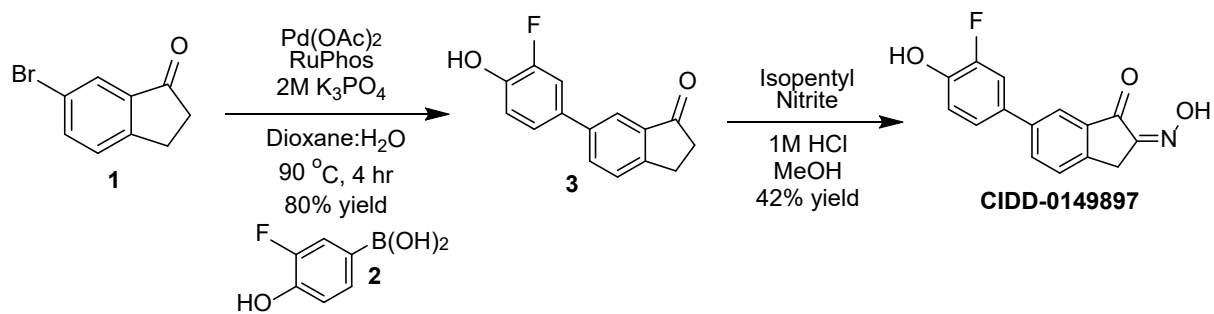

**Supplementary Fig.S1.** Scheme for Synthesis of ER $\beta$  agonist CIDD-0149897

Supplement: NIHMS1922024-supplement-1.pdf [file NIHMS1922024-supplement-1.pdf]
